# Supplementary material
Source: PubMed Central journal article supplement (PMC490017)
Supplement: pnas_101_29_10815__1.pdf [file pnas_101_29_10815__1.pdf]

**Table 1. Oligonucleotide probes used for *in situ* hybridization**

| Name   | Oligonucleotide sequences                           |
|--------|-----------------------------------------------------|
| Emx1-1 | 5'-G TTCCTCTGATGCGGCCACAGCCAGTGGATGGGAGCCCCGCGCC-3' |
| Emx1-2 | 5'-CCAAAGAAGCGATTCCGAAGCACCCAGGGGTAGAAGTGGAG-3'     |
| Emx1-3 | 5'-TGCGAAGGGCCCGTGCAAAAGCAGCCCGTCCTGGGGAACG-3'      |
| Emx1-4 | 5'-ACACCTTCACCTGCGTCTCGGAGAGGCTGAGGCTGCCTGC-3'      |
| Emx1-5 | 5'-GTCATTGGAGGTGACATCAATGTCCTCCCCGTTGGCCTGC-3'      |
| Emx2-1 | 5'-ACTGGAATTGGCGTAGCTGAGTGCCGCGGGACGGATGGGATCC-3'   |
| Emx2-2 | 5'-AGATATCGGTAGCGGTGGATGAGCCAGGGGTAGAAGGTGGA-3'     |
| Emx2-3 | 5'-GGCCAGAGCGTTGTGCAAAAGGAAACTCTCGGGACTTGTG-3'      |
| Emx2-4 | 5'-ATACTTTTACCTGAGTTTCCGTAAGACTGAGACTGTGAGC-3'      |
| Emx2-5 | 5'-ATCGTCTGAGGTCACATCTATTTCTCCGGACTCGCCTGC-3'       |
| Omp1   | 5'-AACCAGCGGCATCTCCAGCTGCTGCTTCTGCGGCCCATCC-3'      |
| Omp2   | 5'-CTGCTTCTTCTCCCCACGCTGCTTCAGGCTCTCTACTCGG-3'      |
| Omp3   | 5'-GGTTGGTGAGGTCGGGCGTCCAGTTCTGCGAGGTGCCCGT-3'      |
| Omp4   | 5'-TGGCCAGATCAGAAAGGCGCTCCCCAAACTCCAGGGCGTC-3'      |
| Omp5   | 5'-TCAGAGCTGGTTAAACACCACAGAGGCCTTTAGGTTGGCA-3'      |
